# Supplementary material for: Stable and Effective Online Monitoring and Feedback Control of PCDD/F during Municipal Waste Incineration
Source: MDPI journal article supplement (doi:10.3390/molecules26144290), 2021-07-15
Supplement: s1 [file s1]

# Stable and Effective Online Monitoring and Feedback Control of PCDD/F during Municipal Waste Incineration

Shijian Xiong <sup>1</sup>, Fanjie Shang <sup>2</sup>, Ken Chen <sup>1</sup>, Shengyong Lu <sup>1,\*</sup>, Shaofu Tang <sup>2</sup>, Xiaodong Li <sup>1</sup> and Kefa Cen <sup>1</sup>

<sup>1</sup> State Key Laboratory of Clean Energy Utilization, Zhejiang University, Hangzhou 310027, China; 11827072@zju.edu.cn (S.X.); 21927009@zju.edu.cn (K.C.); lixd@zju.edu.cn (X.L.); kfcen@zju.edu.cn (K.C.)

<sup>2</sup> Zhejiang Fuchunjiang Environmental Technology Research Co., Ltd., Hangzhou 311401, China; shangfanie@163.com (F.S.); shaofutang263@163.com (S.T.)

\* Correspondence: lushy@zju.edu.cn

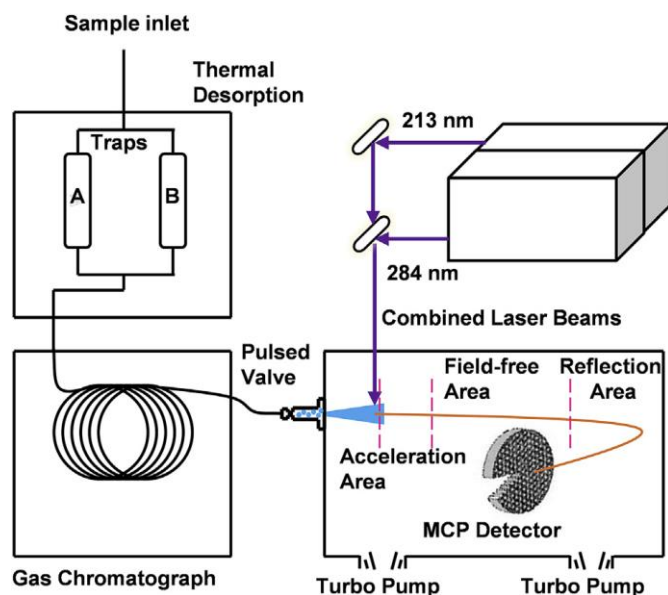

Figure S1. The analysis equipment of 1,2,4-TrCBz (TD-GC-TLI-TOFMS).

Table S1 Original data of Oxygen content and Temperature of furnace outlet, and I-TEQ  
from March 19 to March 25

| Oxygen content | Temperature of furnace outlet | I-TEQ |
|----------------|-------------------------------|-------|
| 4.81           | 829.71                        | 0.36  |
| 5.99           | 791.82                        | 0.70  |
| 4.53           | 825.03                        | 0.06  |
| 14.26          | 729.01                        | 0.03  |
| 13.01          | 667.61                        | 0.06  |
| 7.96           | 770.85                        | 1.02  |
| 9.52           | 812.91                        | 0.36  |
| 4.83           | 809.35                        | 0.80  |
| 4.30           | 815.72                        | 0.97  |
| 10.07          | 783.39                        | 0.48  |
| 5.16           | 780.30                        | 0.28  |
| 9.76           | 845.96                        | 0.55  |
| 4.69           | 833.52                        | 0.28  |
| 8.03           | 840.48                        | 0.31  |
| 10.93          | 740.41                        | 0.06  |
| 8.28           | 801.43                        | 0.04  |
| 11.75          | 811.08                        | 0.16  |
| 10.73          | 758.67                        | 0.01  |
| 11.44          | 791.94                        | 0.06  |
| 11.83          | 772.08                        | 0.08  |
| 12.93          | 767.65                        | 0.09  |
| 9.95           | 759.10                        | 0.06  |
| 9.83           | 785.93                        | 0.01  |
| 9.75           | 744.46                        | 0.26  |
| 9.21           | 742.78                        | 0.38  |
| 8.18           | 827.36                        | 0.48  |
| 9.40           | 725.73                        | 0.68  |
| 11.87          | 741.97                        | 0.68  |
| 10.03          | 781.46                        | 0.48  |
| 2.72           | 773.52                        | 0.28  |
| 11.16          | 803.91                        | 0.36  |
| 10.26          | 812.93                        | 0.53  |
| 6.96           | 747.52                        | 0.41  |
| 11.83          | 725.87                        | 0.26  |
| 5.28           | 830.80                        | 0.80  |
| 6.30           | 786.87                        | 0.75  |
| 10.54          | 755.72                        | 0.21  |
| 8.97           | 783.61                        | 0.23  |
| 9.41           | 814.76                        | 0.36  |
| 3.55           | 850.72                        | 1.68  |

|       |        |      |
|-------|--------|------|
| 8.31  | 831.41 | 2.37 |
| 2.52  | 851.91 | 0.97 |
| 9.33  | 842.76 | 1.29 |
| 7.68  | 818.12 | 1.48 |
| 7.45  | 804.25 | 0.87 |
| 3.39  | 854.32 | 0.60 |
| 4.42  | 894.21 | 0.85 |
| 9.95  | 792.07 | 1.17 |
| 6.21  | 812.25 | 0.77 |
| 8.58  | 820.43 | 0.85 |
| 7.21  | 825.31 | 0.14 |
| 7.56  | 834.90 | 1.58 |
| 8.61  | 719.62 | 1.09 |
| 11.09 | 799.12 | 0.99 |
| 5.70  | 841.95 | 0.36 |
| 7.40  | 820.27 | 0.04 |
| 15.56 | 561.38 | 1.26 |
| 6.46  | 767.89 | 1.06 |
| 5.36  | 753.79 | 1.02 |
| 4.93  | 807.09 | 1.97 |
| 11.05 | 780.72 | 1.06 |
| 9.42  | 764.38 | 1.36 |
| 8.86  | 791.15 | 1.46 |
| 6.28  | 848.22 | 0.68 |
| 11.61 | 688.43 | 0.23 |
| 4.50  | 838.18 | 0.23 |
| 8.35  | 817.15 | 0.70 |
| 7.60  | 816.79 | 0.80 |
| 6.58  | 815.36 | 0.60 |
| 5.00  | 779.78 | 0.50 |
| 5.59  | 849.13 | 0.65 |
| 11.24 | 748.00 | 0.77 |
| 10.50 | 735.09 | 0.46 |
| 6.13  | 811.98 | 0.38 |
| 9.79  | 782.68 | 0.33 |
| 10.54 | 801.43 | 0.23 |
| 6.62  | 821.26 | 0.16 |
| 9.79  | 772.48 | 0.31 |
| 7.67  | 730.79 | 1.04 |
| 8.42  | 820.10 | 0.55 |
| 4.49  | 815.02 | 0.55 |
| 11.91 | 734.85 | 0.06 |
| 3.51  | 826.22 | 0.43 |
| 9.40  | 735.87 | 0.48 |

|       |        |      |
|-------|--------|------|
| 11.01 | 802.38 | 0.31 |
| 7.82  | 785.83 | 0.28 |
| 9.54  | 812.12 | 0.38 |
| 9.20  | 805.36 | 1.34 |
| 8.54  | 788.56 | 0.43 |
| 9.32  | 834.86 | 0.14 |
| 10.93 | 780.23 | 0.04 |
| 11.79 | 719.49 | 0.63 |
| 9.36  | 823.97 | 0.46 |
| 6.38  | 817.48 | 0.31 |
| 8.30  | 832.65 | 0.19 |
| 10.58 | 818.30 | 0.77 |
| 5.19  | 822.29 | 0.41 |
| 11.33 | 747.97 | 0.68 |
| 0.32  | 744.36 | 0.90 |
| 5.63  | 789.53 | 0.77 |
| 10.77 | 795.65 | 1.26 |
| 8.94  | 778.70 | 0.70 |
| 3.86  | 802.80 | 0.11 |
| 7.60  | 808.93 | 0.90 |
| 9.40  | 764.63 | 0.83 |
| 11.64 | 708.85 | 0.36 |
| 11.12 | 664.91 | 0.90 |
| 4.33  | 821.90 | 0.47 |
| 11.64 | 722.07 | 0.23 |
| 5.13  | 864.93 | 0.69 |
| 5.52  | 817.14 | 0.75 |
| 7.27  | 830.67 | 0.42 |
| 5.00  | 860.10 | 0.25 |
| 2.25  | 877.22 | 0.23 |
| 5.48  | 858.86 | 0.23 |
| 8.07  | 864.52 | 0.07 |
| 11.90 | 795.48 | 0.10 |
| 14.45 | 633.08 | 0.05 |
| 19.40 | 399.50 | 0.10 |
| 19.75 | 299.68 | 0.05 |
| 17.00 | 274.21 | 0.28 |
| 8.55  | 762.02 | 0.12 |
| 10.10 | 752.97 | 0.90 |
| 8.58  | 743.91 | 0.59 |
| 8.27  | 836.85 | 0.71 |
| 8.46  | 838.64 | 0.95 |
| 4.54  | 860.82 | 0.46 |
| 10.66 | 769.26 | 0.43 |

|       |        |      |
|-------|--------|------|
| 8.06  | 670.00 | 0.68 |
| 12.10 | 763.04 | 0.84 |
| 3.59  | 815.10 | 1.00 |
| 5.71  | 859.73 | 0.95 |
| 9.48  | 757.43 | 0.68 |
| 6.11  | 858.64 | 0.07 |
| 7.33  | 850.87 | 0.10 |
| 8.49  | 756.25 | 0.04 |
| 11.97 | 764.23 | 0.06 |
| 13.52 | 667.01 | 0.04 |
| 12.30 | 660.85 | 0.06 |
| 11.87 | 783.21 | 0.06 |
| 12.73 | 704.44 | 0.06 |
| 11.98 | 731.64 | 0.06 |
| 12.61 | 726.73 | 0.08 |
| 12.61 | 721.46 | 0.09 |
| 12.77 | 714.49 | 0.11 |
| 12.69 | 709.34 | 0.09 |
| 12.73 | 707.12 | 0.09 |
| 12.89 | 685.73 | 0.09 |
| 12.61 | 693.02 | 0.11 |
| 12.10 | 745.99 | 0.09 |
| 13.09 | 697.35 | 0.09 |
| 13.01 | 687.46 | 0.11 |
| 12.30 | 705.50 | 0.11 |
| 12.22 | 746.11 | 0.12 |
| 12.14 | 736.73 | 0.09 |
| 12.61 | 730.34 | 0.09 |
| 11.94 | 733.45 | 0.09 |
| 11.94 | 723.36 | 0.12 |
| 11.24 | 734.47 | 0.11 |
| 12.07 | 758.51 | 0.11 |
| 13.09 | 573.46 | 0.12 |
| 12.26 | 641.79 | 0.12 |
| 13.09 | 658.24 | 0.11 |
| 12.85 | 668.73 | 0.11 |
| 12.77 | 677.62 | 0.14 |
| 12.81 | 676.09 | 0.12 |
| 12.61 | 681.20 | 0.12 |
| 12.58 | 698.09 | 0.12 |
| 12.42 | 708.55 | 0.11 |
| 11.75 | 721.22 | 0.11 |
| 12.37 | 718.65 | 0.12 |
| 12.63 | 706.44 | 0.11 |

|       |        |      |
|-------|--------|------|
| 12.50 | 704.74 | 0.06 |
| 12.18 | 721.99 | 0.04 |
| 12.77 | 726.27 | 0.03 |
| 14.22 | 587.79 | 0.03 |
| 11.79 | 726.09 | 0.06 |
| 12.61 | 722.29 | 0.06 |
| 13.32 | 680.08 | 0.08 |
| 13.36 | 665.24 | 0.06 |
| 13.24 | 671.07 | 0.03 |
| 13.17 | 672.83 | 0.06 |
| 12.02 | 738.38 | 0.06 |
| 13.59 | 675.47 | 0.04 |
| 13.13 | 619.47 | 0.04 |
| 14.06 | 505.45 | 0.04 |
| 9.08  | 700.59 | 0.06 |
| 9.40  | 768.50 | 0.04 |
| 7.32  | 798.31 | 0.06 |
| 8.78  | 808.29 | 0.06 |
| 1.82  | 822.98 | 0.06 |
| 7.13  | 811.10 | 0.03 |
| 9.12  | 818.22 | 0.04 |
| 8.50  | 818.52 | 0.04 |
| 3.82  | 855.88 | 0.06 |
| 10.70 | 789.12 | 0.03 |
| 5.55  | 799.48 | 0.04 |
| 9.87  | 736.97 | 0.03 |
| 5.87  | 839.19 | 0.04 |
| 6.81  | 868.34 | 0.06 |
| 7.56  | 810.79 | 0.06 |
| 6.54  | 775.61 | 0.08 |
| 8.68  | 775.14 | 0.12 |
| 9.91  | 779.14 | 0.14 |
| 9.94  | 811.57 | 0.04 |
| 5.99  | 810.15 | 0.01 |
| 6.30  | 819.35 | 0.11 |
| 7.24  | 845.52 | 0.09 |
| 9.04  | 797.37 | 0.09 |
| 10.34 | 760.83 | 0.04 |
| 5.40  | 847.76 | 0.03 |
| 7.29  | 813.67 | 0.01 |
| 8.22  | 812.34 | 0.03 |
| 9.00  | 692.10 | 0.06 |
| 9.76  | 732.34 | 0.09 |
| 9.05  | 815.36 | 0.24 |

|       |        |      |
|-------|--------|------|
| 5.63  | 823.34 | 0.04 |
| 10.58 | 742.99 | 0.33 |
| 10.54 | 777.60 | 0.12 |
| 4.93  | 832.17 | 0.06 |
| 6.30  | 830.69 | 0.02 |
| 2.61  | 806.93 | 0.04 |
| 9.09  | 788.35 | 0.03 |
| 9.87  | 774.31 | 0.03 |
| 9.05  | 814.22 | 0.06 |
| 8.34  | 829.30 | 0.19 |
| 7.74  | 820.10 | 0.22 |
| 6.62  | 820.62 | 0.03 |
| 7.52  | 828.17 | 0.04 |
| 10.56 | 827.47 | 0.01 |
| 9.12  | 761.35 | 0.02 |
| 8.57  | 817.33 | 0.03 |
| 12.02 | 817.15 | 0.04 |
| 6.68  | 720.08 | 0.01 |
| 1.18  | 847.72 | 0.05 |
| 10.18 | 759.30 | 0.03 |
| 7.00  | 814.96 | 0.07 |
| 4.61  | 818.41 | 0.21 |
| 7.67  | 791.92 | 0.15 |
| 9.87  | 829.37 | 0.01 |
| 5.43  | 828.77 | 0.15 |
| 8.54  | 801.69 | 0.05 |
| 4.57  | 798.72 | 0.03 |
| 9.79  | 797.77 | 0.07 |
| 9.20  | 800.04 | 0.03 |
| 5.44  | 818.85 | 0.03 |
| 5.66  | 817.08 | 0.03 |
| 7.25  | 821.49 | 0.15 |
| 8.14  | 776.79 | 0.30 |
| 10.69 | 777.77 | 0.03 |
| 6.38  | 724.88 | 0.66 |
| 8.38  | 833.77 | 0.24 |
| 11.90 | 739.44 | 0.03 |
| 5.72  | 775.82 | 0.48 |
| 11.71 | 776.37 | 0.50 |
| 13.24 | 625.60 | 0.01 |
| 14.02 | 647.41 | 0.72 |
| 7.55  | 726.36 | 0.09 |
| 5.52  | 805.75 | 0.09 |
| 11.67 | 791.12 | 0.15 |

|       |        |      |
|-------|--------|------|
| 7.47  | 816.02 | 0.05 |
| 9.71  | 784.19 | 0.01 |
| 5.64  | 778.94 | 0.13 |
| 8.66  | 825.47 | 0.09 |
| 8.81  | 799.83 | 0.09 |
| 8.61  | 807.82 | 0.05 |
| 8.35  | 809.90 | 0.03 |
| 7.75  | 798.54 | 0.07 |
| 11.60 | 776.78 | 0.05 |
| 6.46  | 768.56 | 0.03 |
| 4.69  | 786.05 | 0.07 |
| 9.64  | 781.87 | 0.05 |
| 8.30  | 851.11 | 0.01 |
| 10.42 | 799.29 | 0.05 |
| 6.46  | 816.07 | 0.03 |
| 8.73  | 820.62 | 0.01 |
| 12.34 | 794.92 | 0.01 |
| 12.34 | 773.13 | 0.03 |
| 10.88 | 718.82 | 0.01 |
| 7.60  | 848.87 | 0.07 |
| 12.06 | 771.40 | 0.03 |
| 9.05  | 802.48 | 0.09 |
| 9.01  | 780.69 | 0.07 |
| 7.03  | 797.71 | 0.03 |
| 10.78 | 836.82 | 0.01 |
| 10.20 | 736.22 | 0.02 |
| 10.84 | 775.15 | 0.26 |
| 12.18 | 753.07 | 0.17 |
| 12.57 | 816.19 | 0.04 |
| 7.32  | 832.65 | 0.03 |
| 5.24  | 856.13 | 0.03 |
| 10.93 | 787.16 | 0.02 |
| 11.17 | 780.10 | 0.07 |
| 8.86  | 825.98 | 0.03 |
| 6.81  | 865.19 | 0.03 |
| 10.70 | 815.90 | 0.03 |
| 12.77 | 762.83 | 0.09 |
| 5.59  | 828.72 | 0.09 |
| 7.13  | 830.96 | 0.11 |
| 11.01 | 747.77 | 0.01 |
| 10.19 | 805.76 | 0.09 |
| 11.36 | 728.09 | 0.04 |
| 8.10  | 817.02 | 0.04 |
| 4.41  | 812.55 | 0.02 |



|       |        |      |
|-------|--------|------|
| 7.21  | 820.82 | 0.15 |
| 11.95 | 790.94 | 0.28 |
| 6.62  | 812.01 | 0.35 |
| 10.61 | 796.64 | 0.02 |
| 11.75 | 686.56 | 0.08 |
| 5.95  | 796.64 | 0.08 |
| 8.80  | 812.79 | 0.04 |
| 7.52  | 804.03 | 0.07 |
| 7.29  | 845.00 | 0.04 |
| 7.72  | 808.03 | 0.04 |
| 10.78 | 794.63 | 0.12 |
| 5.90  | 796.07 | 0.56 |
| 10.21 | 775.08 | 0.61 |
| 7.98  | 808.44 | 0.27 |
| 9.20  | 820.84 | 0.37 |
| 6.34  | 801.40 | 0.50 |
| 2.88  | 804.03 | 0.87 |
| 7.95  | 812.97 | 0.22 |
| 11.91 | 671.28 | 0.84 |
| 9.36  | 766.74 | 0.14 |
| 11.24 | 801.88 | 0.15 |
| 11.32 | 779.48 | 0.40 |
| 13.79 | 611.21 | 0.24 |
| 6.49  | 757.69 | 0.06 |
| 7.67  | 766.27 | 0.20 |
| 13.00 | 725.81 | 0.07 |
| 8.02  | 834.42 | 0.45 |
| 13.79 | 670.29 | 0.07 |
| 6.54  | 727.02 | 0.09 |
| 7.21  | 779.43 | 0.01 |
| 4.18  | 831.36 | 0.20 |
| 10.18 | 818.38 | 0.51 |
| 9.71  | 866.80 | 0.28 |
| 7.72  | 806.25 | 0.17 |
| 8.85  | 828.97 | 0.20 |
| 7.70  | 834.66 | 0.06 |
| 6.21  | 760.65 | 0.28 |
| 9.44  | 776.42 | 0.14 |
| 6.11  | 797.82 | 0.04 |
| 11.79 | 738.34 | 0.38 |
| 5.05  | 855.41 | 0.40 |
| 14.46 | 664.48 | 0.32 |
| 13.63 | 621.19 | 0.01 |
| 12.65 | 678.89 | 0.04 |

|       |        |      |
|-------|--------|------|
| 11.59 | 732.83 | 0.06 |
| 12.65 | 707.04 | 0.03 |
| 14.41 | 584.68 | 0.04 |
| 13.36 | 618.89 | 0.02 |
| 11.86 | 721.79 | 0.01 |
| 11.77 | 678.61 | 0.03 |
| 11.20 | 702.58 | 0.01 |
| 6.89  | 814.62 | 0.02 |
| 5.95  | 836.46 | 0.01 |
| 8.53  | 835.17 | 0.04 |
| 8.30  | 776.16 | 0.12 |
| 6.97  | 812.55 | 0.04 |
| 8.82  | 790.76 | 0.10 |
| 6.50  | 778.06 | 0.25 |
| 9.64  | 800.11 | 0.22 |
| 8.77  | 794.08 | 0.15 |
| 6.15  | 875.35 | 0.10 |
| 6.57  | 861.67 | 0.15 |
| 9.13  | 775.46 | 0.19 |
| 6.88  | 766.83 | 0.33 |
| 8.18  | 813.82 | 0.55 |
| 9.01  | 772.95 | 0.14 |
| 10.73 | 803.37 | 0.50 |
| 6.54  | 830.71 | 0.17 |
| 4.49  | 843.32 | 0.07 |
| 2.02  | 834.02 | 0.10 |
| 8.42  | 779.40 | 0.12 |
| 10.42 | 739.91 | 0.02 |
| 9.64  | 831.57 | 0.79 |
| 1.35  | 829.78 | 0.53 |
| 9.94  | 776.72 | 0.20 |
| 10.78 | 792.84 | 0.40 |
| 10.43 | 799.54 | 0.19 |
| 9.08  | 783.02 | 0.17 |
| 5.38  | 796.59 | 0.15 |
| 9.21  | 820.77 | 0.04 |
| 12.15 | 775.63 | 0.03 |
| 10.68 | 773.74 | 0.03 |
| 8.11  | 796.80 | 0.01 |
| 10.25 | 754.73 | 0.03 |
| 12.53 | 775.83 | 0.03 |
| 9.60  | 779.34 | 0.01 |
| 7.52  | 807.51 | 0.04 |
| 3.43  | 844.66 | 0.06 |

|       |        |      |
|-------|--------|------|
| 8.15  | 802.91 | 0.04 |
| 7.24  | 790.85 | 0.01 |
| 9.44  | 807.84 | 0.04 |
| 7.37  | 832.58 | 0.04 |
| 8.07  | 857.03 | 0.01 |
| 7.47  | 816.30 | 0.09 |
| 7.95  | 810.50 | 0.09 |
| 10.48 | 791.39 | 0.06 |
| 6.35  | 806.20 | 0.04 |
| 2.88  | 847.50 | 0.06 |
| 9.52  | 849.57 | 0.09 |
| 6.42  | 839.44 | 0.08 |
| 2.01  | 855.10 | 0.01 |
| 5.70  | 826.16 | 0.30 |
| 4.50  | 826.37 | 0.59 |
| 7.60  | 833.59 | 0.37 |
| 8.51  | 817.84 | 0.27 |
| 5.20  | 836.29 | 0.27 |
| 11.75 | 804.15 | 0.50 |
| 6.19  | 817.83 | 0.22 |
| 8.07  | 831.78 | 0.24 |
| 11.79 | 796.46 | 0.24 |
| 9.64  | 734.68 | 0.03 |
| 8.69  | 773.51 | 0.06 |
| 5.39  | 825.66 | 0.09 |
| 8.42  | 850.42 | 0.07 |
| 5.60  | 806.40 | 0.09 |
| 8.69  | 813.31 | 0.30 |
| 3.92  | 820.91 | 0.14 |
| 10.15 | 770.38 | 0.64 |
| 7.13  | 792.72 | 0.51 |
| 13.64 | 674.83 | 0.24 |
| 11.67 | 763.08 | 0.27 |
| 10.15 | 805.24 | 0.12 |
| 9.29  | 850.85 | 0.12 |
| 8.82  | 820.53 | 0.01 |
| 10.34 | 793.32 | 0.08 |
| 8.27  | 838.72 | 0.08 |
| 7.63  | 755.69 | 0.10 |
| 11.44 | 724.01 | 0.01 |
| 8.94  | 803.26 | 0.06 |
| 10.58 | 763.71 | 0.07 |
| 11.29 | 741.39 | 0.04 |
| 7.72  | 823.06 | 0.03 |

|       |        |      |
|-------|--------|------|
| 8.78  | 851.36 | 0.01 |
| 11.87 | 790.70 | 0.03 |
| 9.64  | 723.18 | 0.04 |
| 8.12  | 796.53 | 0.03 |
| 10.07 | 793.49 | 0.04 |
| 12.07 | 740.18 | 0.06 |
| 8.85  | 804.83 | 0.09 |
| 9.16  | 814.21 | 0.19 |
| 9.71  | 780.40 | 0.07 |
| 10.43 | 743.13 | 0.01 |
| 9.40  | 749.52 | 0.10 |
| 4.97  | 823.72 | 0.17 |
| 7.87  | 865.79 | 0.19 |
| 8.42  | 840.17 | 0.09 |
| 9.48  | 823.87 | 0.20 |
| 6.92  | 826.05 | 0.12 |
| 4.97  | 852.82 | 0.10 |
| 8.66  | 807.42 | 0.07 |
| 13.99 | 717.55 | 0.07 |
| 6.58  | 838.85 | 0.32 |
| 5.91  | 833.76 | 0.12 |
| 9.64  | 827.62 | 0.04 |
| 4.46  | 832.17 | 0.24 |
| 3.94  | 845.74 | 0.15 |
| 7.48  | 841.46 | 0.51 |
| 10.42 | 797.17 | 0.04 |
| 7.16  | 775.69 | 0.07 |
| 6.70  | 790.93 | 0.03 |
| 2.02  | 880.76 | 0.40 |
| 3.71  | 843.03 | 0.38 |
| 3.12  | 843.46 | 0.30 |
| 6.93  | 863.69 | 0.20 |
| 3.79  | 859.75 | 0.53 |
| 5.68  | 840.17 | 0.14 |
| 9.72  | 802.06 | 0.40 |
| 11.87 | 771.92 | 0.61 |
| 6.61  | 786.98 | 0.58 |
| 8.86  | 795.36 | 0.32 |
| 13.48 | 699.89 | 0.90 |
| 5.70  | 754.93 | 0.51 |
| 4.04  | 864.58 | 0.66 |
| 10.42 | 737.85 | 0.22 |
| 1.47  | 825.10 | 0.69 |
| 5.91  | 819.15 | 0.77 |

|       |        |      |
|-------|--------|------|
| 3.12  | 830.09 | 0.77 |
| 8.11  | 852.00 | 0.82 |
| 10.03 | 749.72 | 1.87 |
| 9.05  | 812.10 | 1.77 |
| 7.86  | 829.32 | 1.77 |
| 7.67  | 816.20 | 1.39 |
| 5.20  | 815.38 | 0.63 |
| 2.89  | 857.98 | 1.41 |
| 7.76  | 788.54 | 0.92 |
| 11.60 | 764.93 | 1.04 |
| 11.56 | 709.42 | 0.58 |
| 8.14  | 812.21 | 2.31 |
| 8.93  | 742.11 | 1.54 |
| 8.46  | 761.89 | 1.18 |
| 9.17  | 805.27 | 0.86 |
| 6.97  | 832.26 | 1.59 |
| 5.99  | 825.39 | 0.79 |
| 11.25 | 735.52 | 1.35 |
| 11.75 | 692.29 | 1.30 |
| 6.26  | 796.37 | 1.12 |
| 5.52  | 837.12 | 0.71 |

---
